# Supplementary figures and images for: Electric field induced reversal of spin polarization, magnetic anisotropy and tailored Dzyaloshinskii–Moriya interaction in underoxidized SrRuO3/SrTiO3 heterostructures
Source: Royal Society of Chemistry journal article supplement (doi:10.1039/d0cp06362b), 2021-01-01

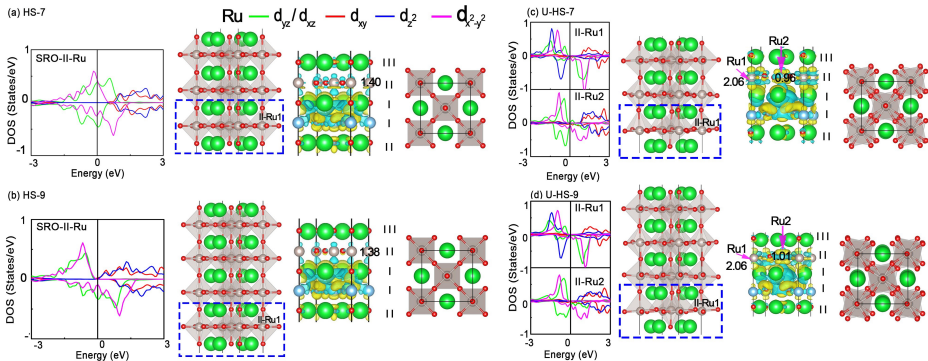

Supplement: d0cp06362b2.pdf [file d0cp06362b2.pdf]
